# Supplementary material
Source: publisher site journal article supplement (https://www.dovepress.com/article/304820)

**Supplementary Figure 1** Subgroup analysis of OS


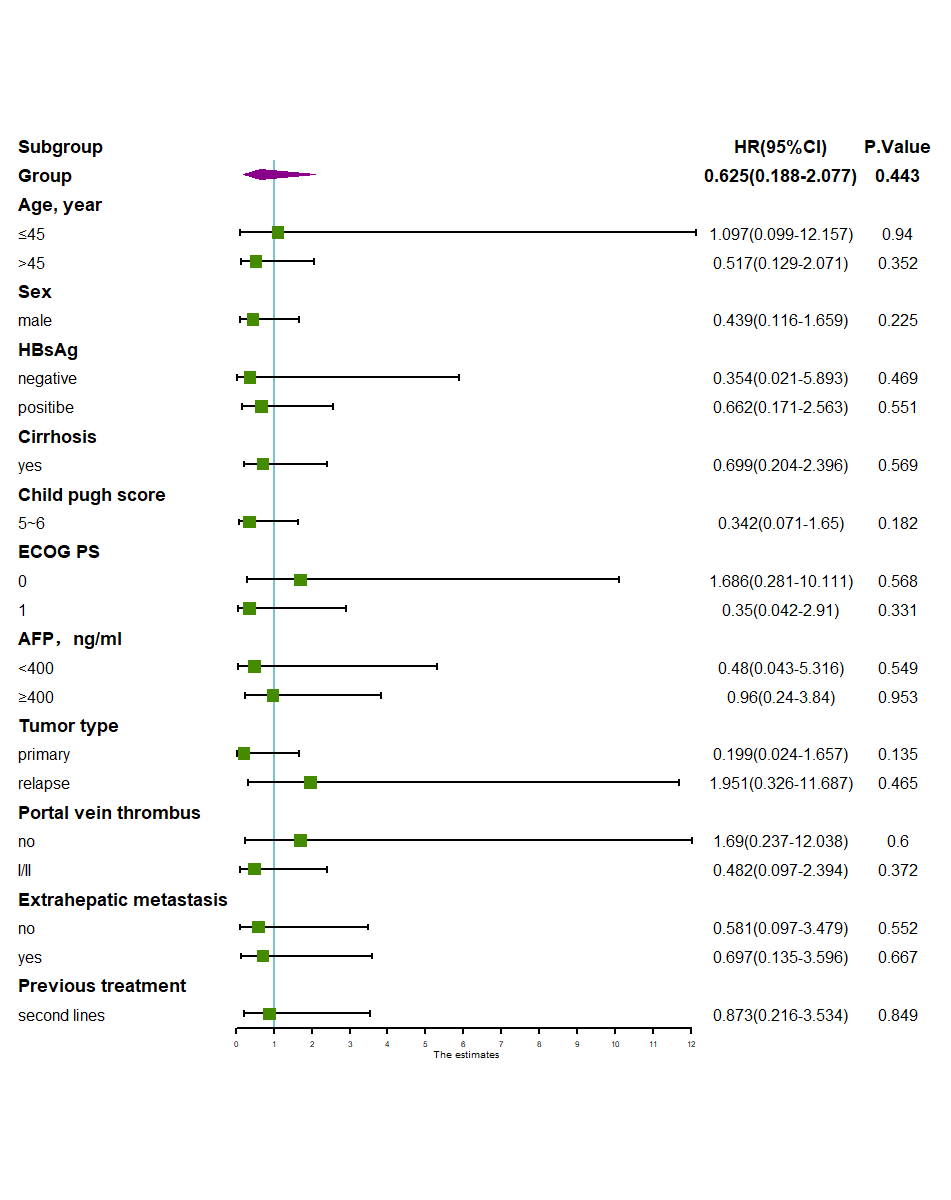


**Supplementary Figure 2** Subgroup analysis of PFS


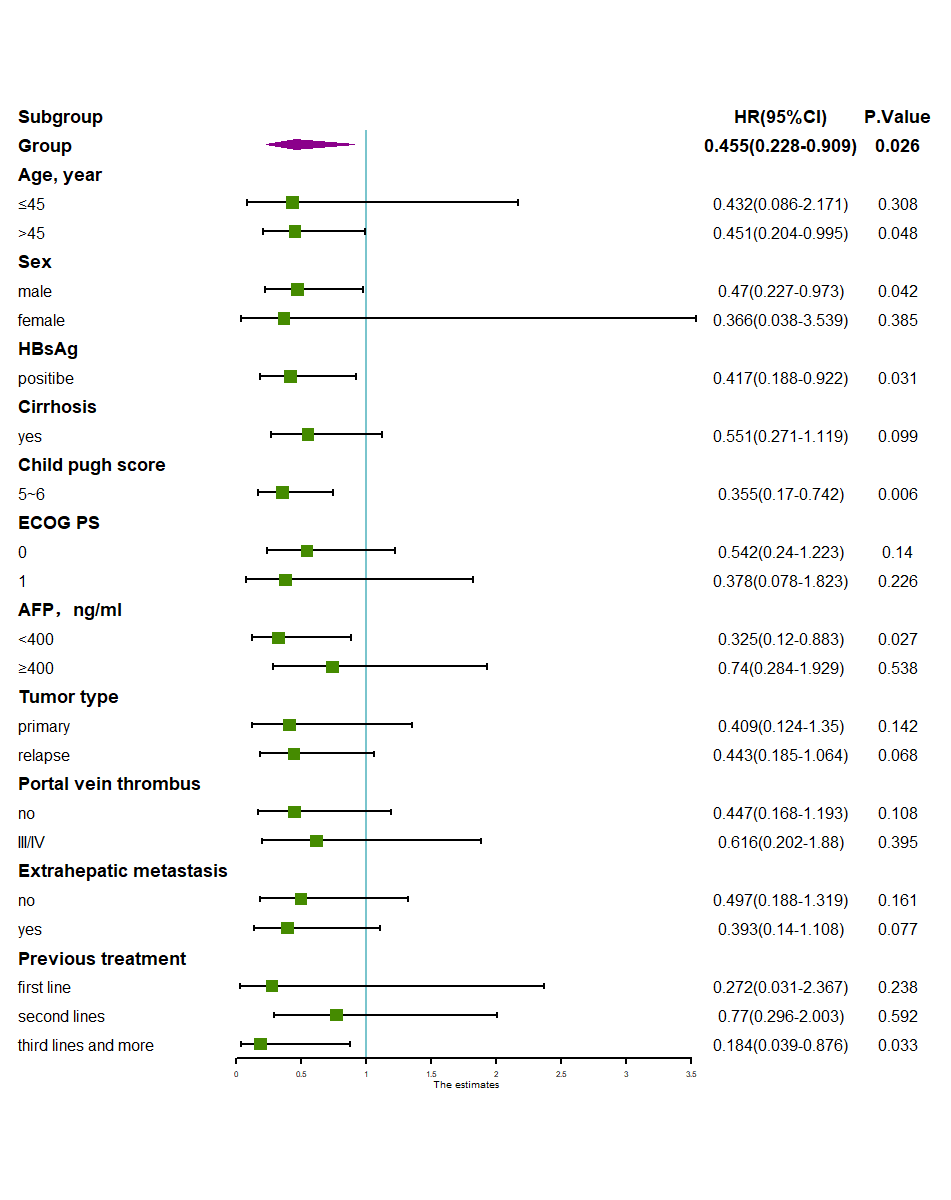

Supplement: Supplementary file 1 [file get_supplementary_file.php]
